# Supplementary material for: Interspecies surfactants serve as public goods enabling surface motility in Pseudomonas aeruginosa
Source: bioRxiv or medRxiv preprint supplement (doi:10.1101/2024.01.03.573969), 2024-04-22
Supplement: Supplementary file [file media-1.pdf]

1 **SUPPLEMENTAL MATERIAL**

2 **TITLE**

3 Interspecies secreted surfactants induce emergent motility in *Pseudomonas aeruginosa*

4

5 **AUTHORS**

6 Delayna L. Warrell<sup>a\*</sup>, Tiffany M. Zarrella<sup>a,b,c##</sup>, Christopher Machalek<sup>a</sup>, Anupama Khare<sup>a#</sup>

7

8 <sup>a</sup>Laboratory of Molecular Biology, Center for Cancer Research, National Cancer Institute, National  
9 Institutes of Health, Bethesda, MD, USA

10 <sup>b</sup>Postdoctoral Research Associate Training Program, National Institute of General Medical  
11 Sciences, National Institutes of Health, Bethesda, MD, USA

12 <sup>c</sup>Current address: Department of Biology, Georgetown University, Washington, DC, USA

13

14 Running head: Surfactants induce motility in *P. aeruginosa*

15

16 #Address correspondence to Tiffany M. Zarrella, [tiffany.zarrella@georgetown.edu](mailto:tiffany.zarrella@georgetown.edu), or Anupama  
17 Khare, [anupama.khare@nih.gov](mailto:anupama.khare@nih.gov)

18 \*Delayna L. Warrell and Tiffany M. Zarrella contributed equally to this work. Author order was  
19 determined alphabetically.

20

21 Key words: *Pseudomonas aeruginosa*, *Staphylococcus aureus*, surfactants, motility,  
22 polymicrobial interactions, phenol-soluble modulins

23

24 The authors declare no conflict of interest.

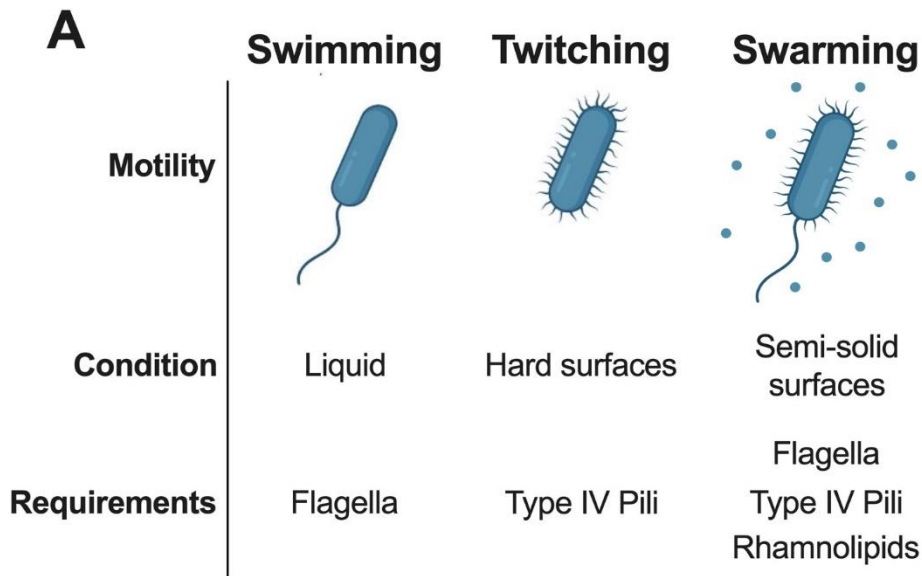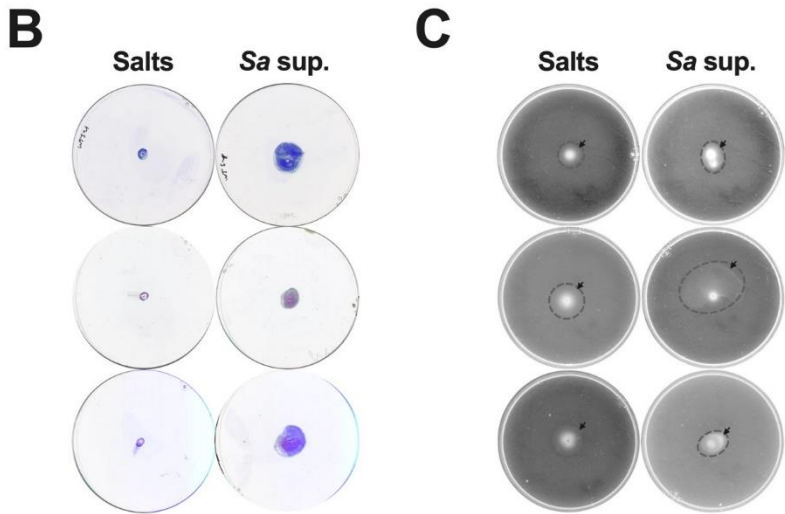

26

27 **Supplemental Figure 1. *S. aureus* secreted products alter *P. aeruginosa* twitching and**

28 **swimming motility. (A)** (Left to right) *P. aeruginosa* swimming motility occurs in liquid

29 conditions and requires flagella (1), twitching motility occurs on hard surfaces and requires type

30 IV pili (2), and swarming motility occurs on semi-solid surfaces and requires flagella, type IV pili,

31 and rhamnolipids (3, 4). **(B,C)** *P. aeruginosa* was inoculated on **(B)** twitch plates and **(C)** swim

32 plates containing 25% media salts control or *S. aureus* supernatant. **(B)** Twitch plates were

33 incubated for 48 hours, visualized by crystal violet staining, and imaged. **(C)** Swim plates were  
34 imaged after 24 hours incubation. Arrows indicate the swim boundaries, and the dashed lines  
35 are drawn just outside the swim boundaries to depict the shape of the swim area. **(B,C)** Three  
36 independent replicates are shown.

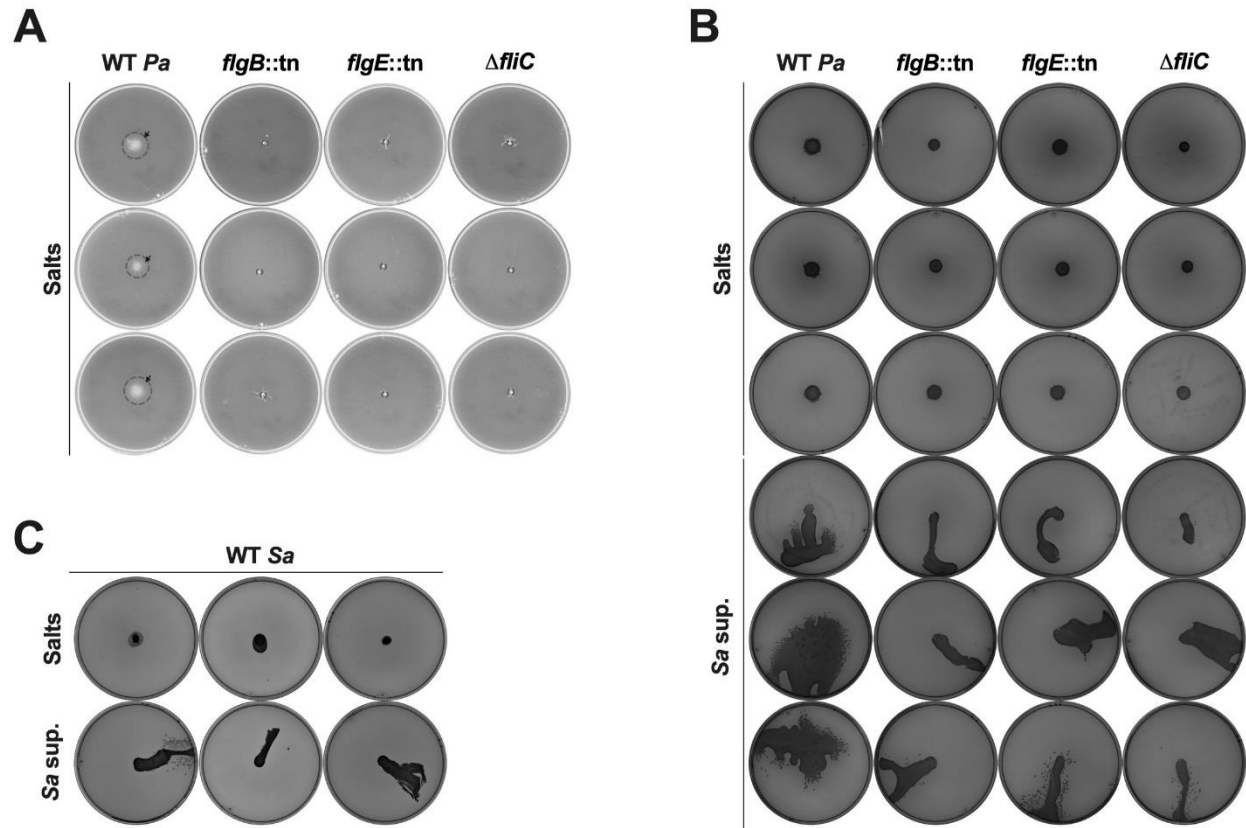

37

38 **Supplemental Figure 2. *P. aeruginosa* flagellar mutants do not exhibit emergent motility.**

39 The indicated strains of **(A,B)** *P. aeruginosa* or **(C)** *S. aureus* were inoculated on **(A)** swim  
 40 plates or **(B,C)** hard agar plates containing 25% media salts control or *S. aureus* supernatant,  
 41 and motility was imaged after 24 hours incubation. **(A)** Arrows indicate the swim boundaries,  
 42 and the dashed lines are drawn just outside the swim boundaries to depict the shape of the  
 43 swim area. **(A-C)** Three independent replicates are shown.

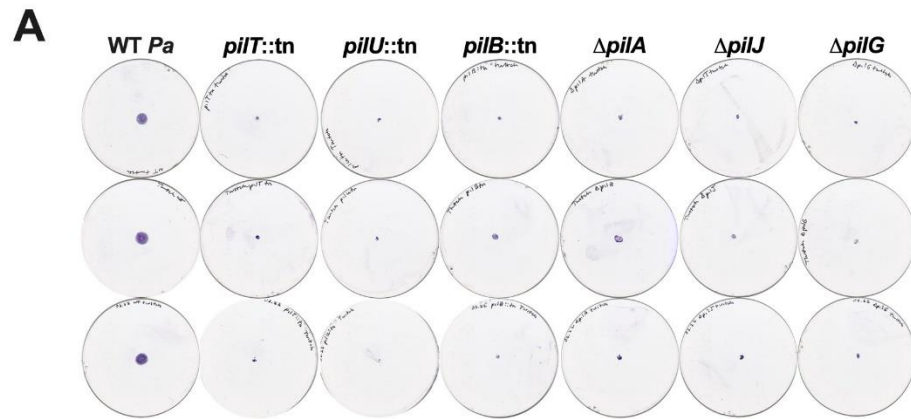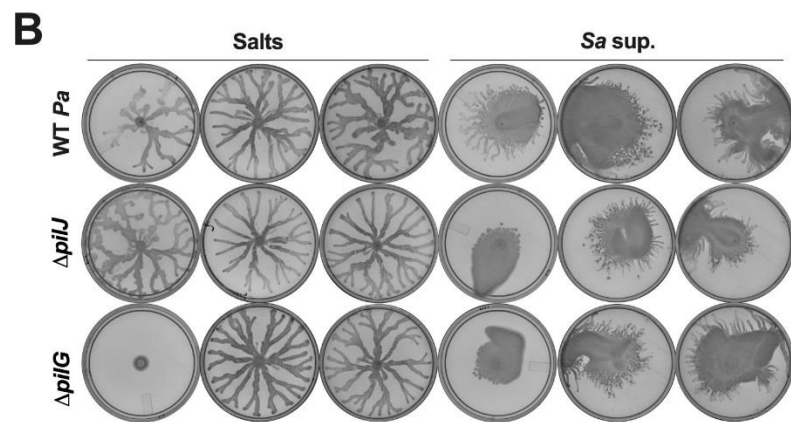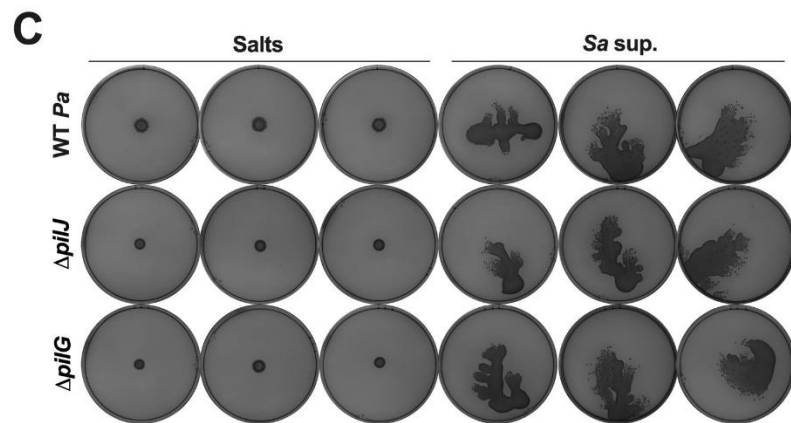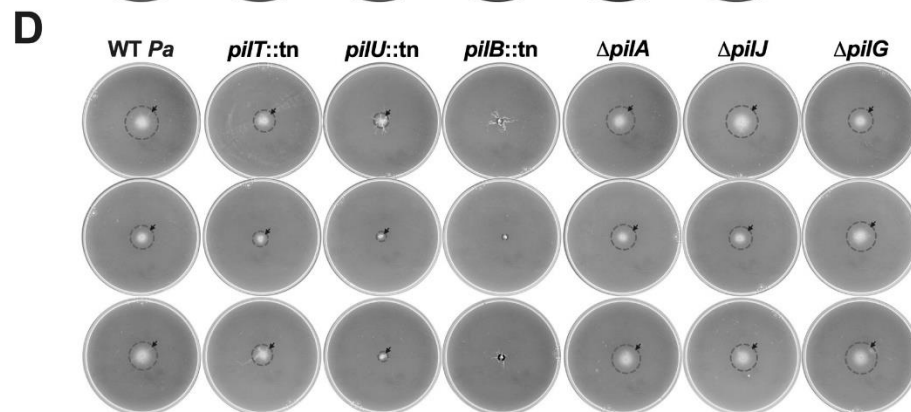

45 **Supplemental Figure 3. *P. aeruginosa* pili mutants do not twitch but exhibit emergent**  
46 **motility.** The indicated *P. aeruginosa* strains were inoculated on **(A)** twitch plates, **(B)** semi-  
47 solid agar plates, **(C)** hard agar plates, or **(D)** swim plates containing 25% media salts control or  
48 *S. aureus* supernatant. **(A)** Twitch plates composed of LB agar were inoculated with the  
49 indicated strain of *P. aeruginosa*, incubated for 48 hours, visualized by crystal violet staining,  
50 and imaged. **(B-D)** Plates were imaged after 24 hours incubation. **(D)** Arrows indicate the swim  
51 boundaries, and the dashed lines are drawn just outside the swim boundaries to depict the  
52 shape of the swim area. **(A-D)** Three independent replicates are shown.

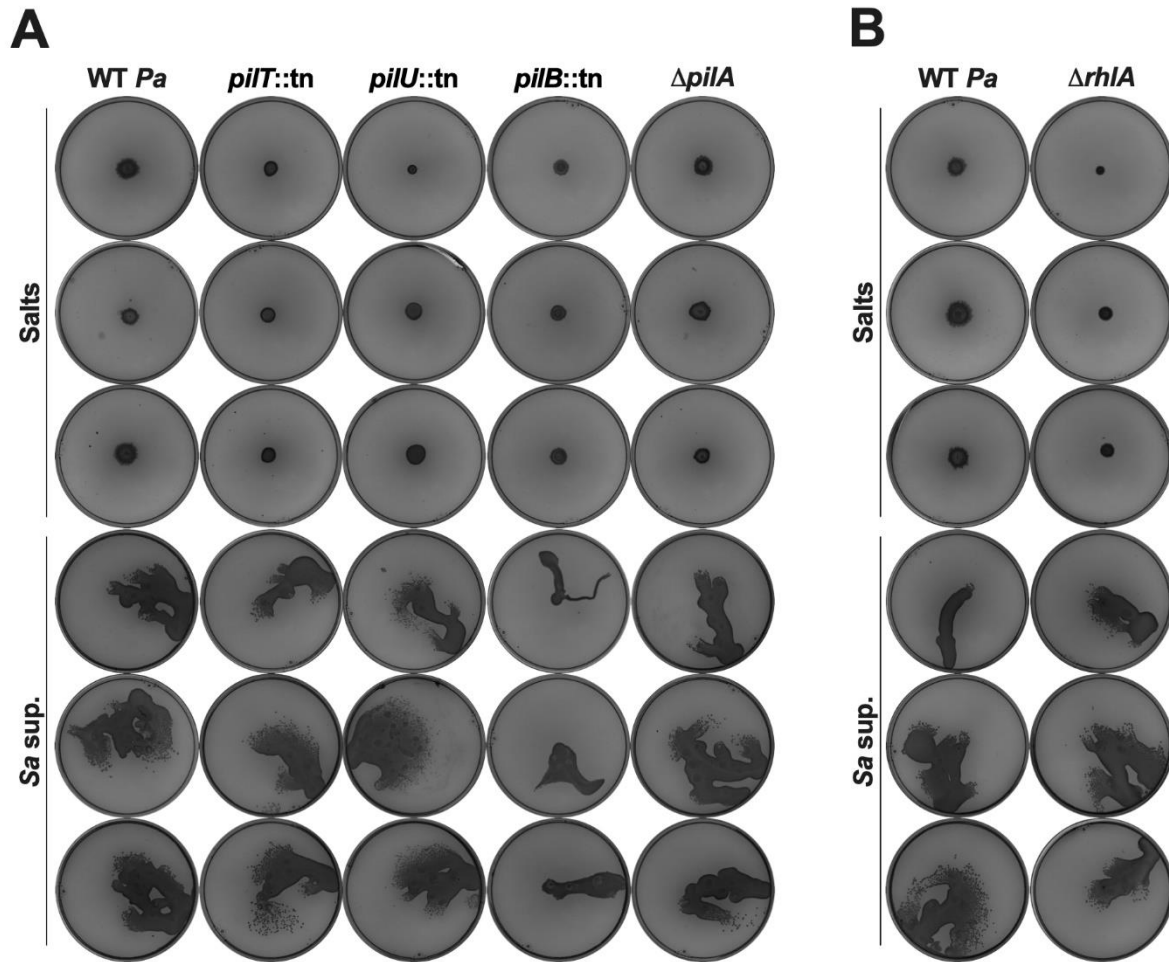

53

54 **Supplemental Figure 4. Pili function and rhamnolipids are not required for emergent**  
 55 **motility on hard agar. (A,B)** The indicated *P. aeruginosa* strains were inoculated on hard agar  
 56 plates containing 25% media salts control or *S. aureus* supernatant, and motility was imaged  
 57 after 24 hours incubation. Three independent replicates are shown.

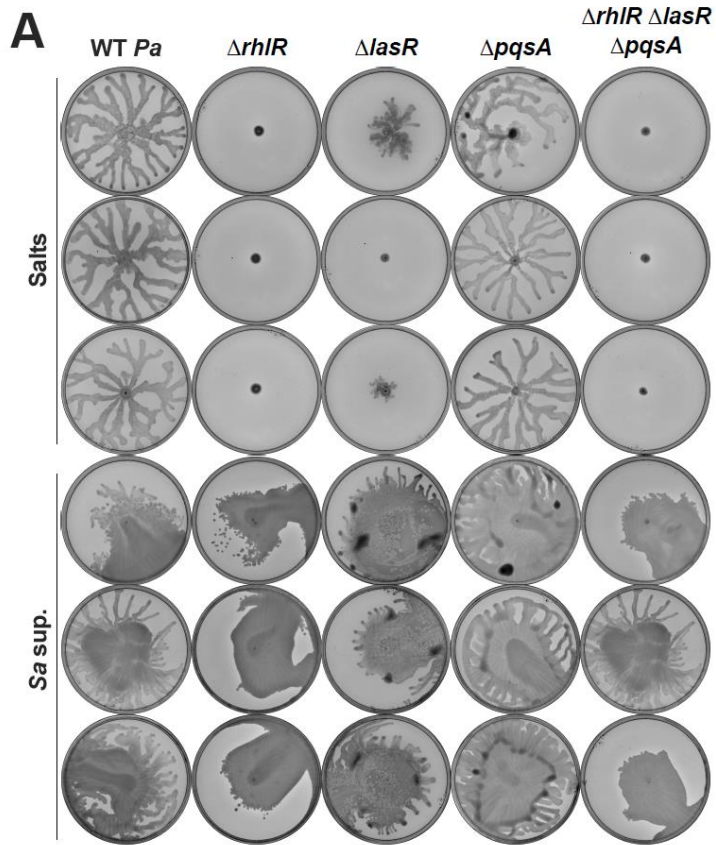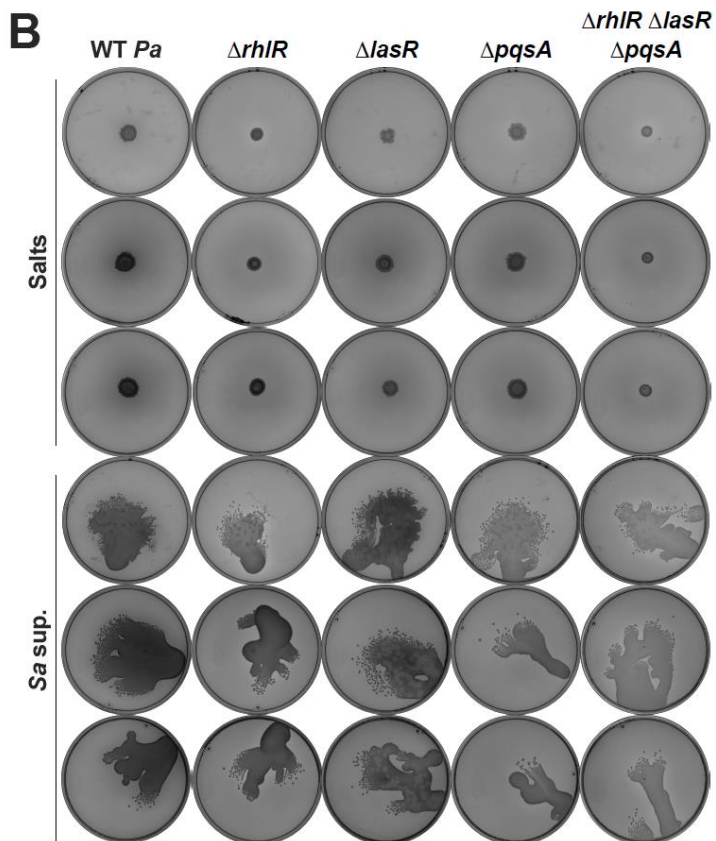



59 **Supplemental Figure 5. The *P. aeruginosa* quorum sensing systems are not required for**  
60 **emergent motility.** The indicated *P. aeruginosa* strains were inoculated on **(A)** semi-solid or **(B)**  
61 hard agar plates containing 25% media salts control or *S. aureus* supernatant, and motility was  
62 imaged after 24 hours incubation. Three independent replicates are shown.

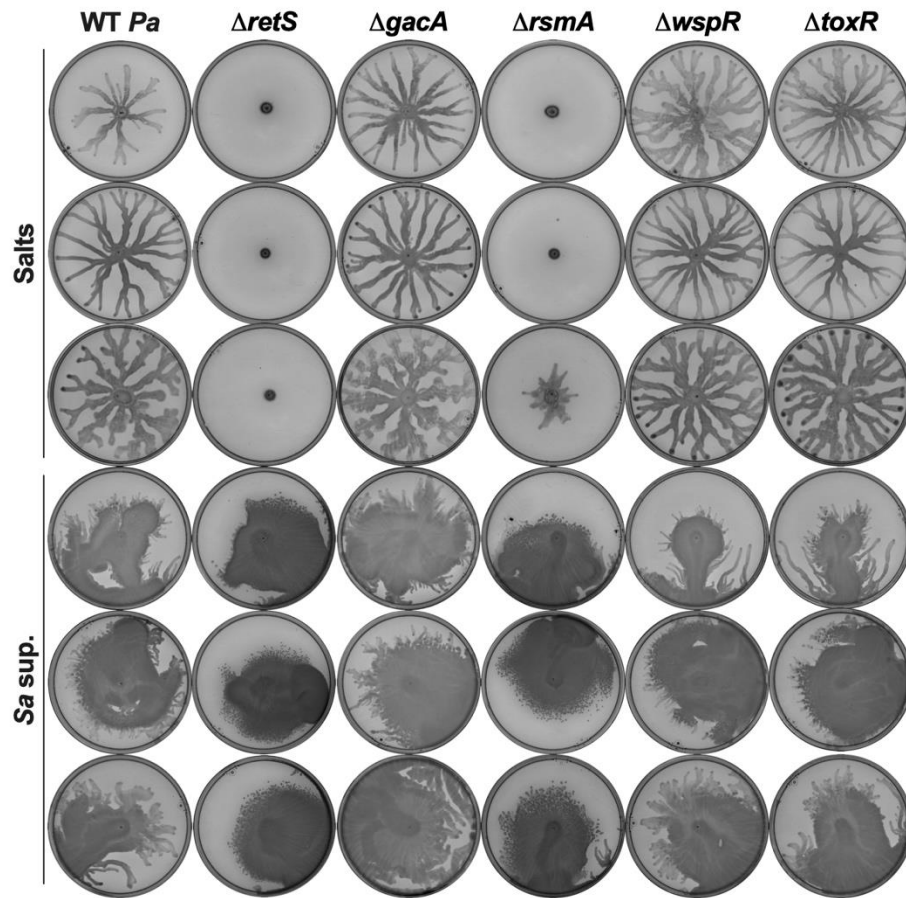

63

64 **Supplemental Figure 6. Several *P. aeruginosa* regulators are not required for emergent**  
 65 **motility.** The indicated *P. aeruginosa* strains were inoculated on semi-solid agar plates  
 66 containing 25% media salts control or *S. aureus* supernatant, and motility was imaged after 24  
 67 hours incubation. Three independent replicates are shown.

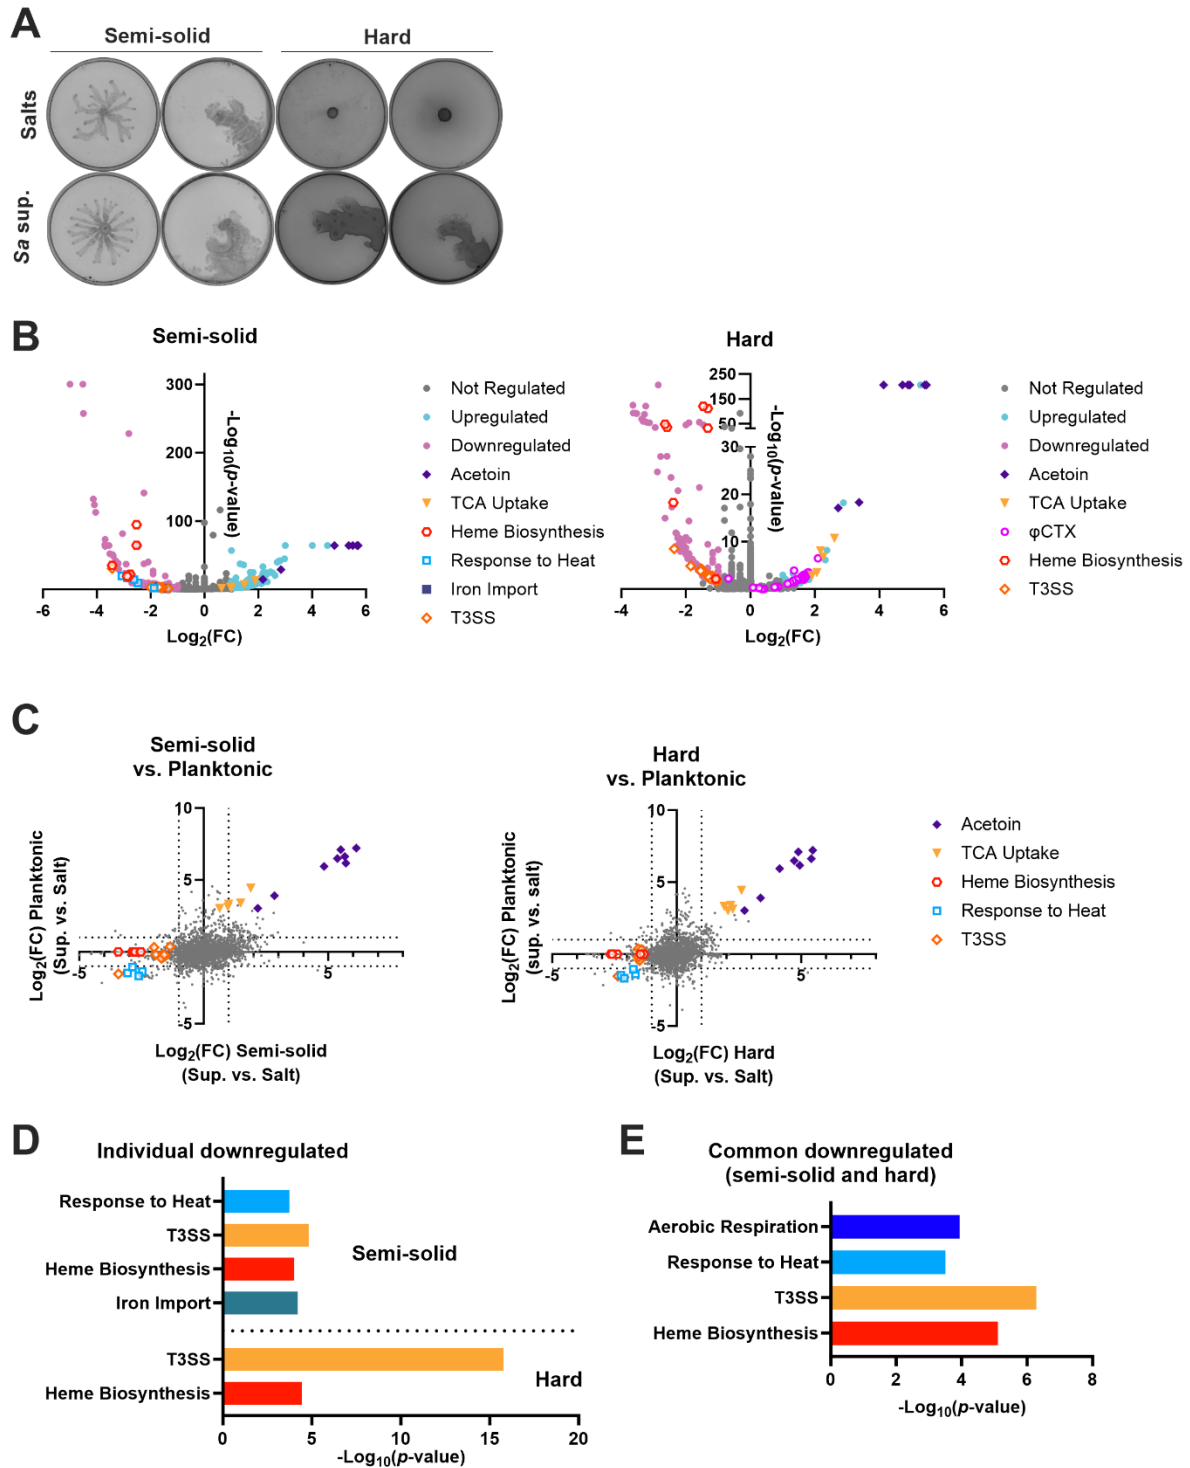

71 **(A)** WT *P. aeruginosa* cells were scraped from the leading edge on semi-solid and hard agar  
72 plates containing 25% media salts or *S. aureus* supernatant after 17 hours of incubation. Both  
73 independent replicates used for the RNA-seq are shown prior to scraping. **(B)** Volcano plots of -  
74  $\log_{10}(p\text{-value})$  vs.  $\log_2(\text{fold-change})$  transcript levels after exposure to *S. aureus* supernatant  
75 compared to media salts control after 17 hours on **(left)** semi-solid or **(right)** hard agar. Genes  
76 shown as upregulated or downregulated have  $p < 0.05$  and  $\log_2(\text{fold-change}) \geq 1$  or  $\leq -1$   
77 respectively. **(C)** Scatter plots of  $\log_2(\text{fold-change})$  transcript levels in *P. aeruginosa* after 17  
78 hours on **(left)** semi-solid or **(right)** hard agar containing *S. aureus* supernatant compared to 2  
79 hours exposure to *S. aureus* supernatant in planktonic culture (5). Genes shown as upregulated  
80 or downregulated have  $p < 0.05$  and  $\log_2(\text{fold-change}) \geq 1$  or  $\leq -1$  respectively. **(D,E)** Gene  
81 Ontology (GO) enrichment (6-8) of *P. aeruginosa* genes downregulated after 17 hours  
82 incubation on **(D, top)** semi-solid and **(D, bottom)** hard agar plates or commonly downregulated  
83 on **(E)** both agar plates containing *S. aureus* supernatant. Nonredundant categories shown.

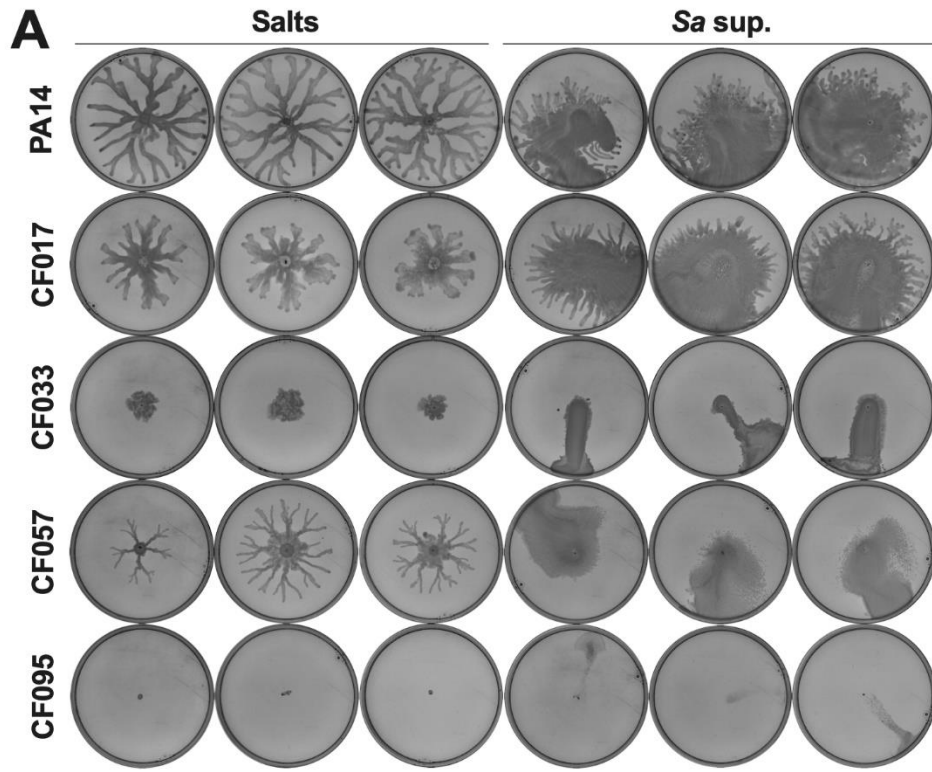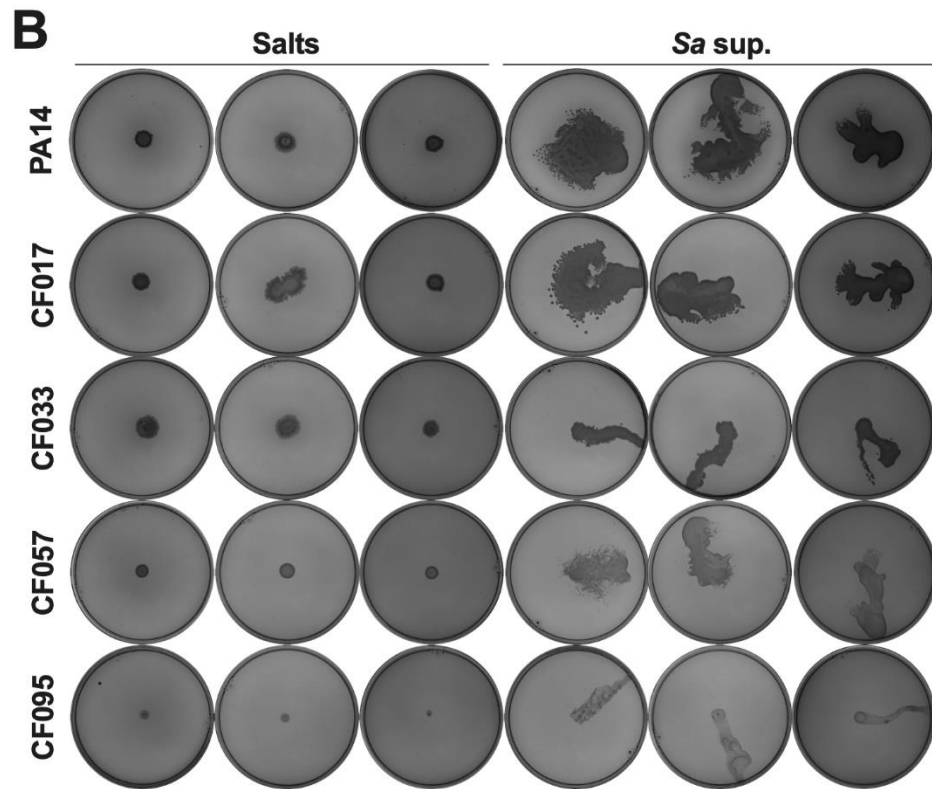

85 **Supplemental Figure 8. Clinical isolates of *P. aeruginosa* also exhibit emergent motility.**  
86 The indicated *P. aeruginosa* strains were inoculated on **(A)** semi-solid or **(B)** hard agar plates  
87 containing 25% media salts control or *S. aureus* supernatant, and motility was imaged after 24  
88 hours incubation.

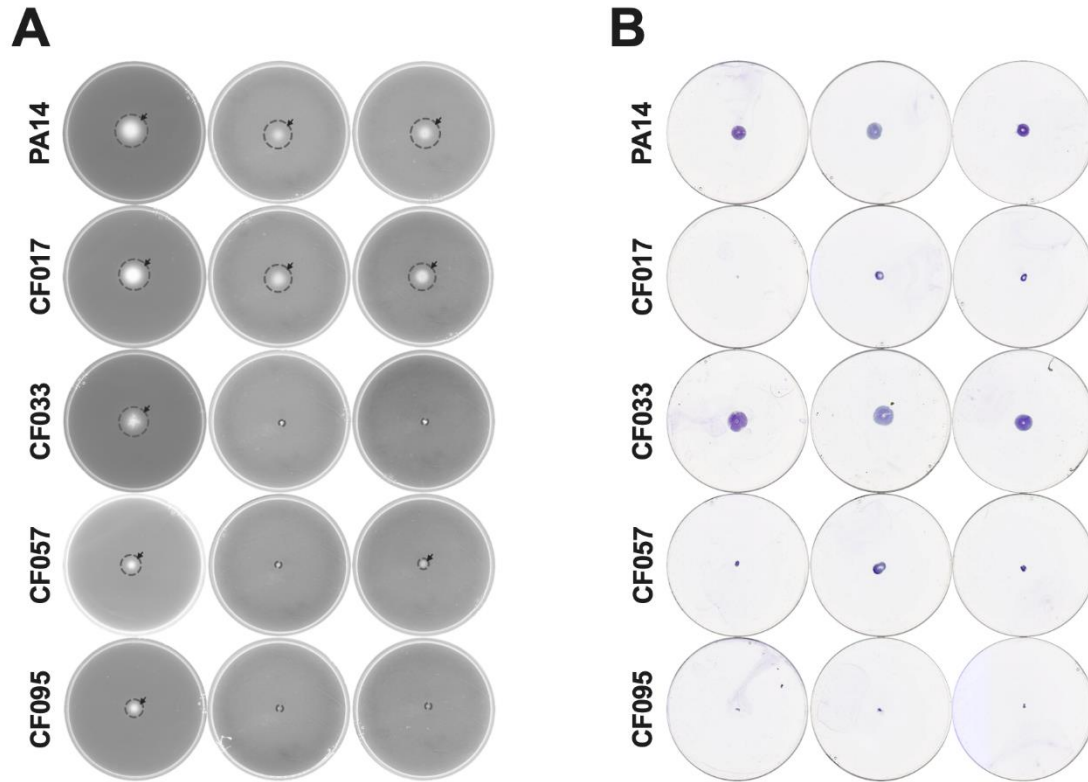

89

90 **Supplemental Figure 9. *P. aeruginosa* clinical isolates show motility defects.** The indicated

91 *P. aeruginosa* strains were inoculated on **(A)** swim plates containing 25% media salts control or

92 **(B)** twitch plates containing LB agar. **(A)** Swim plates were imaged after 24 hours incubation.

93 Arrows indicate the swim boundaries, and the dashed lines are drawn just outside the swim

94 boundaries to depict the shape of the swim area. **(B)** Twitch plates were incubated for 48 hours,

95 visualized by crystal violet staining, and imaged. **(A,B)** Three independent replicates are shown.

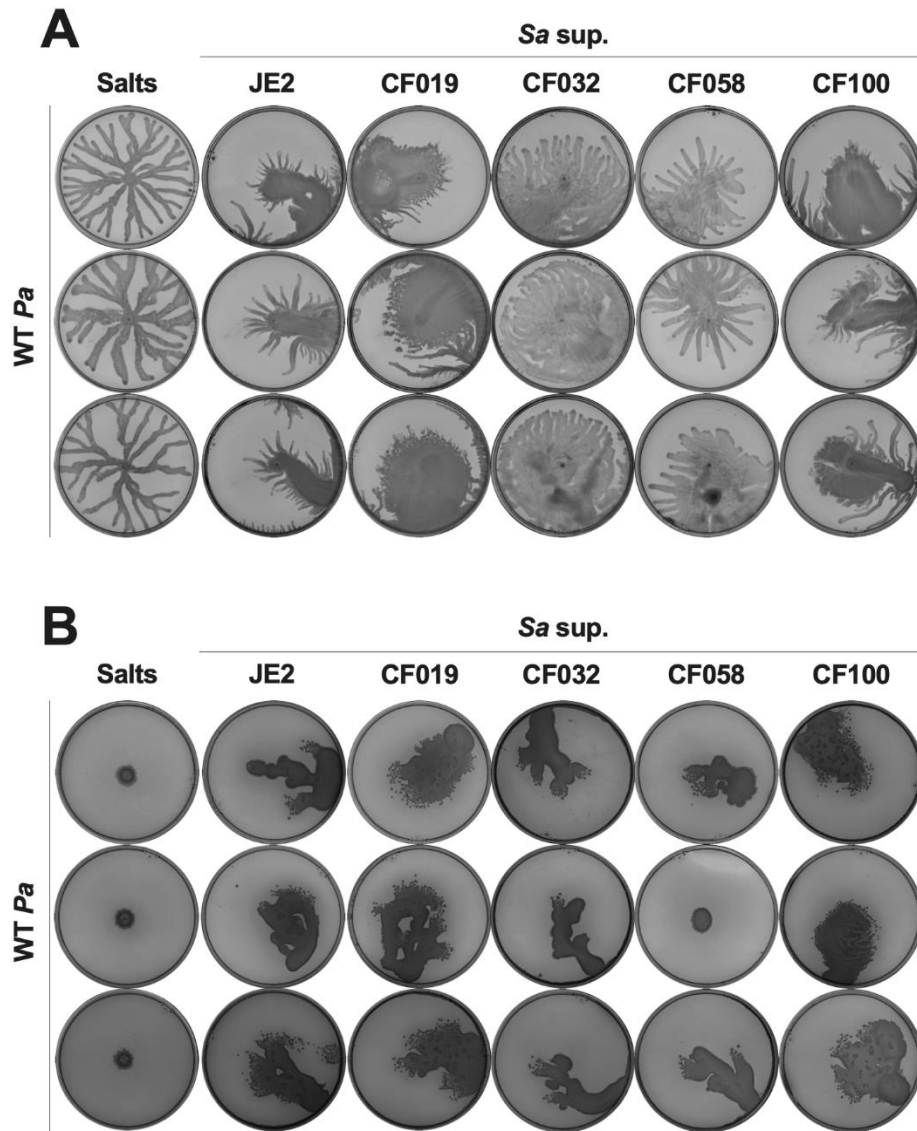

96

97 **Supplemental Figure 10. *P. aeruginosa* exhibits emergent motility on supernatant from *S.***

98 ***aureus* clinical isolates. *P. aeruginosa* PA14 was inoculated on (A) semi-solid or (B) hard agar**

99 **plates containing 25% media salts or 25% supernatant from the indicated *S. aureus* strains.**

100 **Motility was imaged after 24 hours incubation. Three independent replicates are shown.**



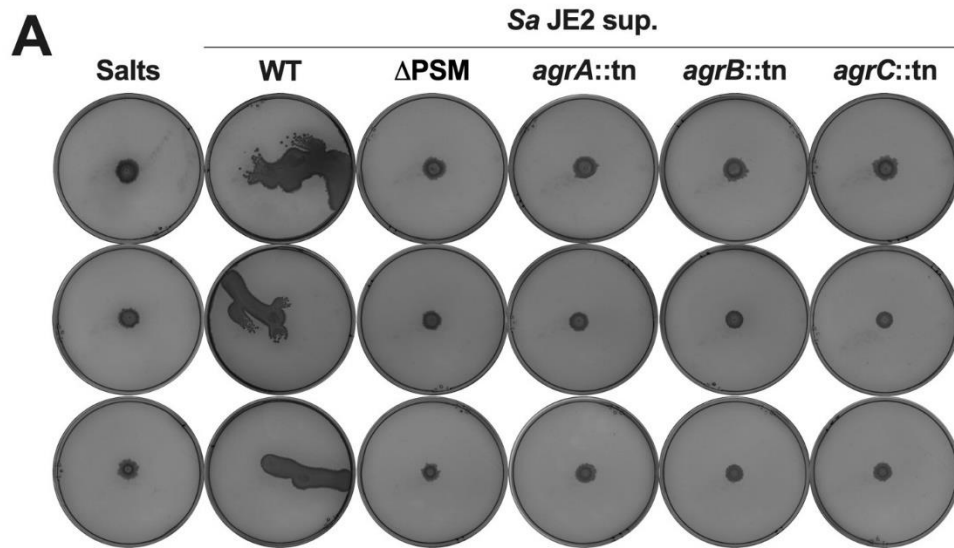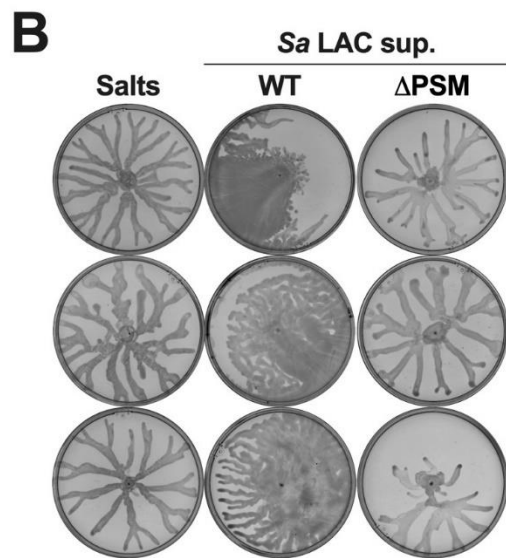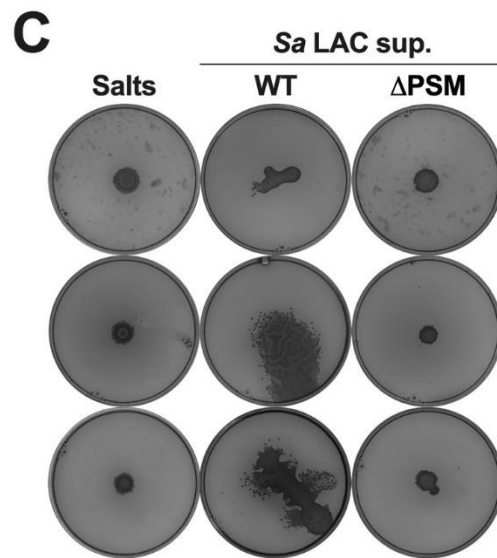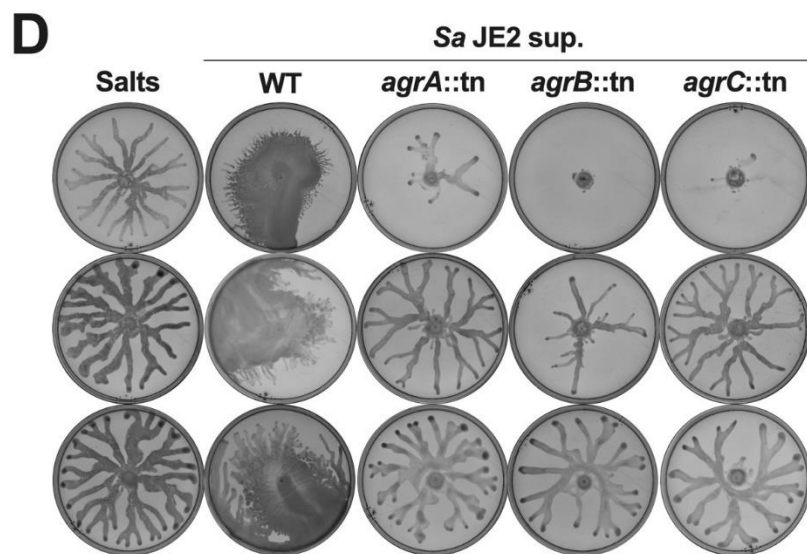

102 **Supplemental Figure 11. *P. aeruginosa* does not exhibit emergent motility on *S. aureus***  
103 **supernatant lacking surfactant biosynthesis.** *P. aeruginosa* was inoculated on **(A,C)** hard or  
104 **(B,D)** semi-solid agar plates containing 25% media salts or supernatant from the indicated *S.*  
105 *aureus* strains, and motility was imaged after 24 hours incubation. Three independent replicates  
106 are shown.

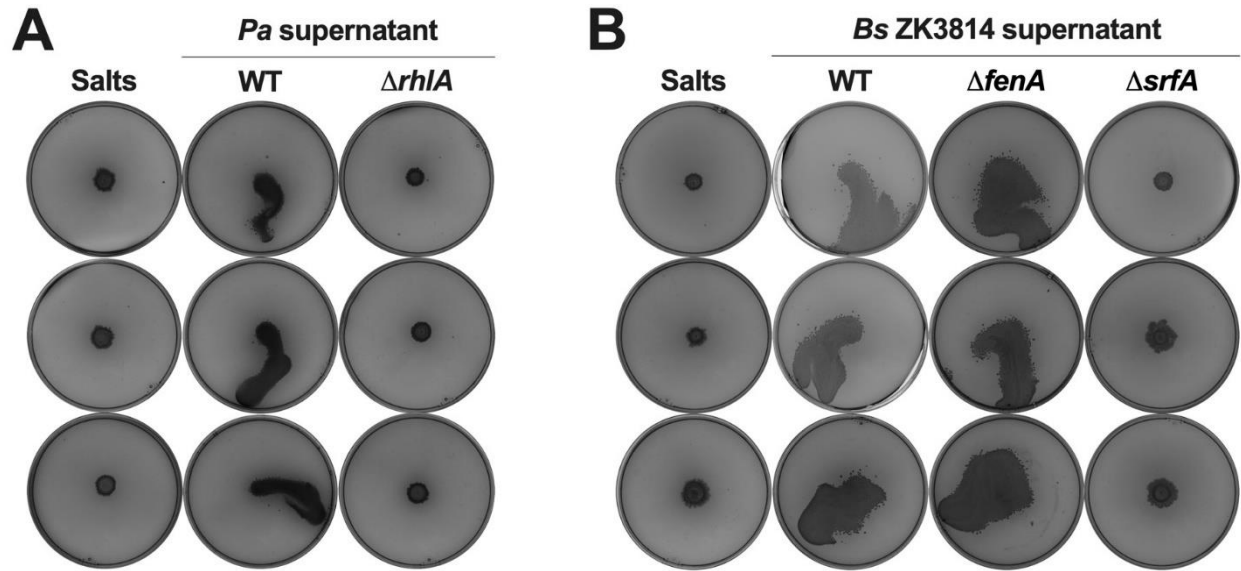

107

108 **Supplemental Figure 12. Surfactant biosynthesis is required to induce emergent motility**

109 **in *P. aeruginosa*.** *P. aeruginosa* was inoculated on hard agar plates containing 25% salts or

110 supernatant from the indicated strain of **(A)** *P. aeruginosa* or **(B)** *B. subtilis* ZK3814, and motility

111 was imaged after 24 hours incubation. Three independent replicates are shown.

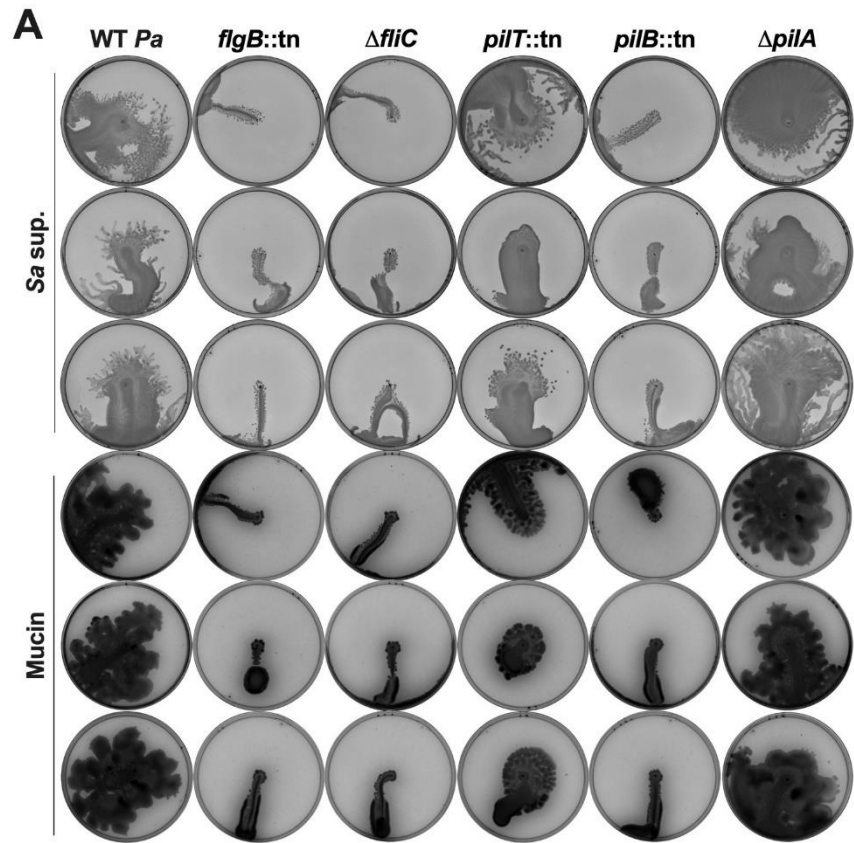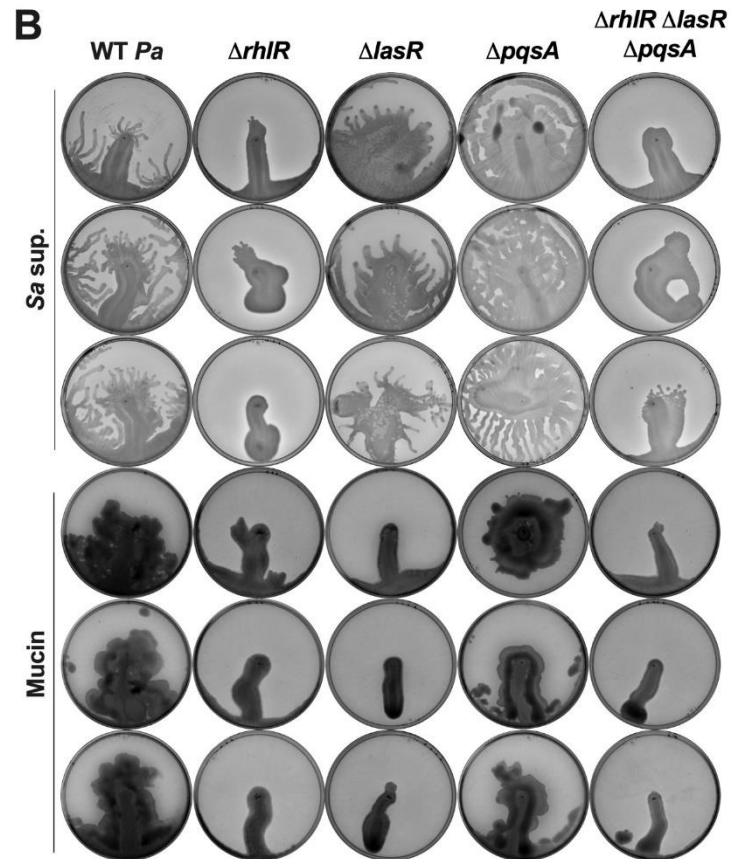

113 **Supplemental Figure 13. Quorum sensing and flagella, but not pili, are required for**  
114 **motility on mucin. (A,B)** The indicated *P. aeruginosa* strains were inoculated on semi-solid  
115 agar plates containing 25% *S. aureus* supernatant or 25% media salts control with the addition  
116 of 0.4% mucin, and motility was imaged after 24 hours incubation. Three independent replicates  
117 are shown.

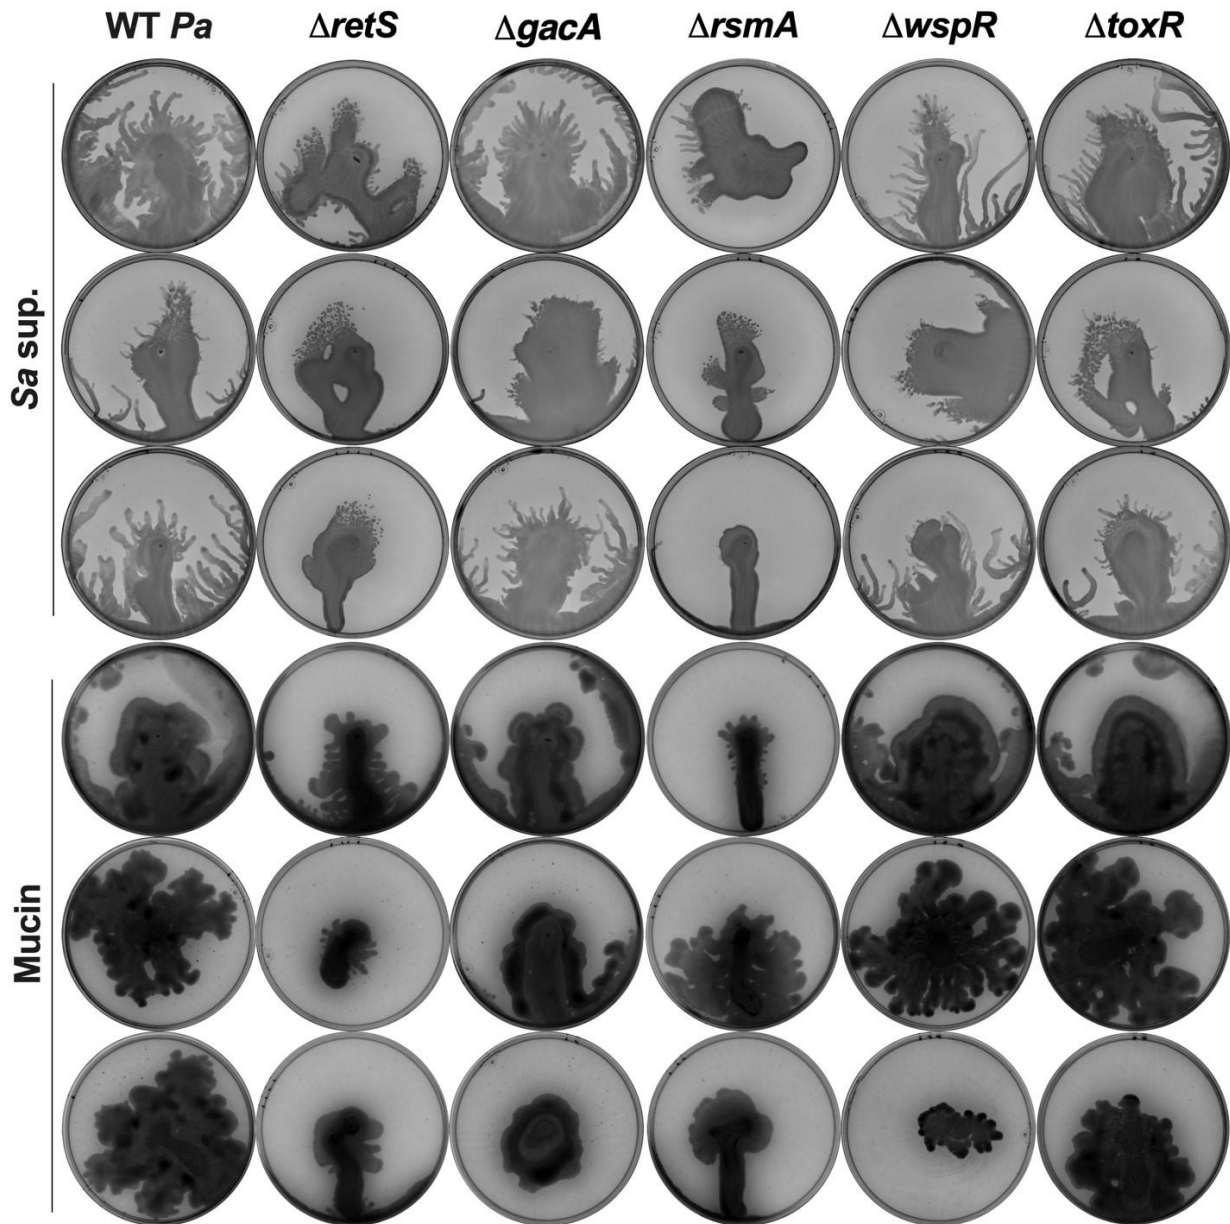

119

120 **Supplemental Figure 14. Known *P. aeruginosa* motility regulatory systems are not**  
 121 **required for movement on mucin.** The indicated *P. aeruginosa* strains were inoculated on  
 122 semi-solid agar plates containing 25% of *S. aureus* supernatant or 25% media salts control with  
 123 the addition of 0.4% mucin, and images were taken after 24 hours incubation. Three  
 124 independent replicates shown.

125 **SUPPLEMENTAL TABLES**

126 **Supp. Table 1. Gene expression in *P. aeruginosa* from semi-solid or hard agar at 17**  
127 **hours after exposure to *S. aureus* supernatant or media salts control determined from**  
128 **RNA-seq analysis. (Excel)** Gene expression was analyzed by RNA-seq from RNA purified  
129 from two biological replicates of each treatment at 17 hours (semi-solid or hard agar with  
130 addition of *S. aureus* supernatant or media salts control).

131  
132 **Supp. Table 2. Differentially expressed genes between *P. aeruginosa* from semi-solid or**  
133 **hard agar plates after exposure to *S. aureus* supernatant or media salts control**  
134 **determined from RNA-seq analysis. (Excel)** Gene expression was analyzed by RNA-seq  
135 from purified RNA from two biological replicates of each treatment after 17 hours (semi-solid or  
136 hard agar with addition of *S. aureus* supernatant or media salts control). Fold change indicates  
137 the mean expression of the supernatant-exposed *P. aeruginosa* over the control.

138  
139 **Supp. Table 3. Differentially expressed genes in common between *P. aeruginosa* from**  
140 **semi-solid and hard agar plates after exposure to *S. aureus* supernatant or media salts**  
141 **control determined from RNA-seq analysis. (Excel)** Gene expression was analyzed by RNA-  
142 seq from purified RNA from two biological replicates of each treatment after 17 hours (semi-  
143 solid or hard agar with addition of *S. aureus* supernatant or media salts control). Genes  
144 commonly upregulated or downregulated from the semi-solid and hard agar conditions are  
145 listed. Fold change indicates the mean expression of the supernatant-exposed *P. aeruginosa*  
146 over the control.

147  
148 **Supp. Table 4. Differentially expressed genes in common between *P. aeruginosa* from**  
149 **semi-solid or hard agar and planktonic growth, or semi-solid and hard agar exclusively,**  
150 **after exposure to *S. aureus* supernatant or media salts control determined from RNA-seq**

151 **analysis. (Excel)** Gene expression was analyzed by RNA-seq from purified RNA from two  
152 biological replicates of each treatment after 17 hours (semi-solid or hard agar and planktonic  
153 growth with addition of *S. aureus* supernatant or media salts control). Genes commonly  
154 upregulated or downregulated from the semi-solid or hard agar and planktonic growth  
155 conditions, or semi-solid and hard agar exclusively, are listed. Fold change indicates the mean  
156 expression of the supernatant-exposed *P. aeruginosa* over the control.

157

158 **Supp. Table 5. Gene ontology (GO) enrichment of upregulated and downregulated genes**  
159 **after *P. aeruginosa* exposure to *S. aureus* exoproducts. (Excel)** GO enrichment of *P.*  
160 *aeruginosa* genes differentially expressed on semi-solid and hard agar plates individually as  
161 well as in both, in common with planktonic cells, as well as exclusively in both motility conditions  
162 (but not in planktonic cells).



Supp. Table 6. Bacterial strains and plasmids used in this study.

| Strain               | Description <sup>a,b</sup>                                                               | Source           |
|----------------------|------------------------------------------------------------------------------------------|------------------|
| <i>P. aeruginosa</i> |                                                                                          |                  |
| PA14                 | University of California Berkeley Plant Pathology (UCBPP)-PA14                           | (9)              |
| 33660                | PA14 MAR2xT7 PA14_05180::tn ( <i>pilT</i> ); Gent <sup>r</sup>                           | (10)             |
| 42562                | PA14 MAR2xT7 PA14_50480::tn ( <i>flgB</i> ); Gent <sup>r</sup>                           | (10)             |
| 48241                | PA14 MAR2xT7 PA14_50450::tn ( <i>flgE</i> ); Gent <sup>r</sup>                           | (10)             |
| 53607                | PA14 MAR2xT7 PA14_05190::tn ( <i>pilU</i> ); Gent <sup>r</sup>                           | (10)             |
| 56672                | PA14 MAR2xT7 PA14_58750::tn ( <i>pilB</i> ); Gent <sup>r</sup>                           | (10)             |
| AK619                | PA14 ΔPA14_51430 ( <i>pqsA</i> ) unmarked                                                | (11)             |
| CF017                | AMT0194-10; co-isolated with CF019; age: 4.91 years                                      | CFF Isolate Core |
| CF033                | AMT0457-07; co-isolated with CF032; age: 4.28 years                                      | CFF Isolate Core |
| CF057                | AMT0461-12; co-isolated with CF058; age: 12.16 years                                     | CFF Isolate Core |
| CF095                | AMT0492-16; co-isolated with CF100; age: 13.52 years                                     | CFF Isolate Core |
| SB049                | PA14 expressing GFP; Gent <sup>r</sup>                                                   | This study       |
| SB092                | PA14 ΔPA14_19100 ( <i>rhlA</i> ) unmarked                                                | This study       |
| SB387                | PA14 ΔPA14_45960 ( <i>lasR</i> ) unmarked                                                | This study       |
| SB392                | PA14 ΔPA14_19120 ( <i>rhlR</i> ) unmarked                                                | This study       |
| SB400                | PA14 ΔPA14_05360 ( <i>pilJ</i> ) unmarked                                                | This study       |
| SB401                | PA14 ΔPA14_05320 ( <i>pilG</i> ) unmarked                                                | This study       |
| SB402                | PA14 ΔPA14_16500 ( <i>wspR</i> ) unmarked                                                | This study       |
| SB403                | PA14 ΔPA14_55160 ( <i>toxR</i> ) unmarked                                                | This study       |
| SB426                | PA14 ΔPA14_30650 ( <i>gacA</i> ) unmarked                                                | This study       |
| SB428                | PA14 ΔPA14_58730 ( <i>pilA</i> ) unmarked                                                | This study       |
| SB431                | PA14 ΔPA14_64230 ( <i>retS</i> ) unmarked                                                | This study       |
| SB446                | PA14 ΔPA14_50290 ( <i>fliC</i> ) unmarked                                                | This study       |
| SB452                | PA14 ΔPA14_45960 ( <i>lasR</i> ) ΔPA14_19120 ( <i>rhlR</i> ) ΔPA14_51430 ( <i>pqsA</i> ) | This study       |
| SB454                | PA14 ΔPA14_52570 ( <i>rsmA</i> ) unmarked                                                | This study       |
| SB485                | SB446 expressing GFP                                                                     | This study       |
| SB489                | PA14 expressing mKO                                                                      | This study       |
| <i>S. aureus</i>     |                                                                                          |                  |
| JE2                  | <i>Staphylococcus aureus</i> subsp. <i>aureus</i> USA300_FPR3757 (CA-MRSA)-JE2           | (12)             |
| NE95                 | JE2 SAUSA300_1989::tn ( <i>agrB</i> ); Em <sup>r</sup>                                   | (13)             |
| NE873                | JE2 SAUSA300_1991::tn ( <i>agrC</i> ); Em <sup>r</sup>                                   | (13)             |
| NE1532               | JE2 SAUSA300_1992::tn ( <i>agrA</i> ); Em <sup>r</sup>                                   | (13)             |
| CF019                | AMT0194-12; co-isolated with CF017; age: 4.91 years                                      | CFF Isolate Core |
| CF032                | AMT0457-03; co-isolated with CF033; age: 4.28 years                                      | CFF Isolate Core |
| CF058                | AMT0461-13; co-isolated with CF057; age: 12.16 years                                     | CFF Isolate Core |
| CF100                | AMT0492-21; co-isolated with CF095; age: 13.52 years                                     | CFF Isolate Core |
| SB209                | JE2 pKM16; Cm <sup>r</sup>                                                               | This study       |
| SB350                | JE2 ΔPSM alpha1-4 delta (ATT)                                                            | D. Limoli; (14)  |
| SB371                | LAC                                                                                      | M. Otto          |
| SB372                | LAC ΔPSM alpha1-4 beta1-2 delta (ATT)                                                    | M. Otto; (15)    |

|                                                    |                                                                                           |                       |
|----------------------------------------------------|-------------------------------------------------------------------------------------------|-----------------------|
| <i>E. coli</i>                                     |                                                                                           |                       |
| <i>ccdB</i><br>Survival 2<br>T1 <sup>R</sup>       | <i>E. coli</i> strain used for maintenance of pDONR plasmid                               | Invitrogen            |
| DH5α                                               | <i>E. coli</i> strain used for cloning                                                    | NEB                   |
| IM08B                                              | <i>E. coli</i> strain used for cloning                                                    | BEI Resources         |
| S17-1 λ-pir                                        | <i>E. coli</i> strain used for conjugation                                                | (16)                  |
| AK111                                              | MG1655 SB144                                                                              | (17)                  |
| Other species                                      |                                                                                           |                       |
| SB145                                              | <i>Bacillus subtilis</i> PY79                                                             | K. Ramamurthi         |
| SB146                                              | <i>Burkholderia cenocepacia</i> ; ATCC 25608                                              | S. Adhya              |
| SB147                                              | <i>Klebsiella pneumoniae</i> subsp. <i>pneumoniae</i> KPNIH1                              | S. Adhya              |
| SB149                                              | <i>Vibrio cholerae</i>                                                                    | S. Adhya              |
| SB373                                              | <i>B. subtilis</i> ZK3814                                                                 | M. Otto; (18)         |
| SB374                                              | ZK3814 Δ <i>fenA</i>                                                                      | M. Otto; (18)         |
| SB375                                              | ZK3814 Δ <i>srfA</i>                                                                      | M. Otto; (18)         |
| SB468                                              | <i>B. cenocepacia</i> ; ATCC BAA-245                                                      | S. Adhya              |
| <b>Plasmids</b>                                    |                                                                                           |                       |
| <i>Gene deletion</i>                               |                                                                                           |                       |
| pDONRP<br>EX18Gm                                   | Shuttle vector with <i>attP</i> sites and <i>ccdB</i> ; Cm <sup>r</sup> Gent <sup>r</sup> | (19)                  |
| pAK611                                             | pEX18ApGW: ΔPA14_51430 ( <i>pqsA</i> ); Ap <sup>r</sup> Gent <sup>r</sup>                 | (11)                  |
| pSB445                                             | pDONRPEX18Gm: ΔPA14_50290 ( <i>fliC</i> ); Gent <sup>r</sup>                              | This study            |
| pSB491                                             | pDONRPEX18Gm: ΔPA14_19100 ( <i>rhlA</i> ); Gent <sup>r</sup>                              | This study            |
| pSB388                                             | pDONRPEX18Gm: ΔPA14_45960 ( <i>lasR</i> ); Gent <sup>r</sup>                              | This study            |
| pSB391                                             | pDONRPEX18Gm: ΔPA14_19120 ( <i>rhlR</i> ); Gent <sup>r</sup>                              | This study            |
| pSB396                                             | pDONRPEX18Gm: ΔPA14_05360 ( <i>pilJ</i> ); Gent <sup>r</sup>                              | This study            |
| pSB397                                             | pDONRPEX18Gm: ΔPA14_05320 ( <i>pilG</i> ); Gent <sup>r</sup>                              | This study            |
| pSB398                                             | pDONRPEX18Gm: ΔPA14_16500 ( <i>wspR</i> ); Gent <sup>r</sup>                              | This study            |
| pSB399                                             | pDONRPEX18Gm: ΔPA14_55160 ( <i>toxR</i> ); Gent <sup>r</sup>                              | This study            |
| pSB420                                             | pDONRPEX18Gm: ΔPA14_64230 ( <i>retS</i> ); Gent <sup>r</sup>                              | This study            |
| pSB421                                             | pDONRPEX18Gm: ΔPA14_30650 ( <i>gacA</i> ); Gent <sup>r</sup>                              | This study            |
| pSB422                                             | pDONRPEX18Gm: ΔPA14_58730 ( <i>pilA</i> ); Gent <sup>r</sup>                              | This study            |
| pSB453                                             | pDONRPEX18Gm: ΔPA14_52570 ( <i>rsmA</i> ); Gent <sup>r</sup>                              | This study            |
| <i>Express fluorescent marker</i>                  |                                                                                           |                       |
| pKM16                                              | Expressing DsRed from SarA-P1 promoter; Ap <sup>r</sup> Cm <sup>r</sup>                   | S. Brinsmade;<br>(20) |
| pUC18T-<br>mini-<br>Tn7T-<br>Gm-<br><i>gfpmut3</i> | Expressing GFP; Ap <sup>r</sup> Gent <sup>r</sup>                                         | H. Schweizer;<br>(21) |
| pUC18T-<br>mini-<br>Tn7T-<br>Gm- <i>mKO</i>        | Expressing mKO; Ap <sup>r</sup> Gent <sup>r</sup>                                         | H. Schweizer;<br>(21) |

164 <sup>a</sup> Ap<sup>r</sup>, ampicillin resistance (*E. coli*); Cm<sup>r</sup>, chloramphenicol resistance (*E. coli*, *S. aureus*); Em<sup>r</sup>,  
165 erythromycin resistance (*S. aureus*); Gent<sup>r</sup>, gentamicin resistance (*P. aeruginosa*)  
166 <sup>b</sup> CFF Isolate Core Samples are annotated as follows: AMT####-## (Patient ID-Isolate number)

167 **Supp. Table 7. Primers used in this study\*.**

| Primer             | Sequence 5'→3'                                    | Site <sup>^</sup> | Location*                 | Application                       |
|--------------------|---------------------------------------------------|-------------------|---------------------------|-----------------------------------|
| Pa003              | ggacttatcagccaacctgtt                             | -                 | MAR2xT7<br>transposon     | Verify<br>transposon<br>insertion |
| Pa061              | ggggacaagttgtacaaaaagcaggctcaccatgtgaccctcgattct  | <i>attB1</i>      | Up<br>PA14_19100          | Generate<br>mutant                |
| Pa062              | ggttcaggcgtagccgatcatctcacacctcccaaaaa            | -                 | Up and down<br>PA14_19100 | Generate<br>mutant                |
| Pa063              | ttttgggaggtgtgagatgatcggtacgcctgaacc              | -                 | Up and down<br>PA14_19100 | Generate<br>mutant                |
| Pa064              | ggggaccactttgtacaagaaagctgggtacacggtgaactggggtgta | <i>attB2</i>      | Down<br>PA14_19100        | Generate<br>mutant                |
| Pa065 <sup>#</sup> | aaatcggacaagtggattcg                              | -                 | Up<br>PA14_19100          | Sanger<br>sequencing              |
| Pa066 <sup>#</sup> | atcgagaaagcgttgcagtt                              | -                 | Down<br>PA14_19100        | Sanger<br>sequencing              |
| Pa108              | tgaagaaccaggacctgatg                              |                   | Up<br>PA14_50450          | Verify<br>transposon<br>insertion |
| Pa109              | gctcatggagacgtacagca                              |                   | Down<br>PA14_50450        | Verify<br>transposon<br>insertion |
| Pa229 <sup>#</sup> | gctgttcgacggcagttatc                              | -                 | Up<br>PA14_19120          | Sanger<br>sequencing              |
| Pa230              | ggggacaagttgtacaaaaagcaggctcaaactgcaacgctttctcgat | <i>attB1</i>      | Up<br>PA14_19120          | Generate<br>mutant                |
| Pa231              | tacgcttcagatgaggccagcaaaaaagcctccgctattcct        | -                 | Up and down<br>PA14_19120 | Generate<br>mutant                |
| Pa232 <sup>#</sup> | aacggctgacgacctcac                                | -                 | Down<br>PA14_19120        | Sanger<br>sequencing              |
| Pa233              | aggaatgacggaggcttttctgctggcctcatctgaagcgta        | -                 | Up and down<br>PA14_19120 | Generate<br>mutant                |
| Pa234              | ggggaccactttgtacaagaaagctgggtagtgtagcgcaacagcatct | <i>attB2</i>      | Down<br>PA14_19120        | Generate<br>mutant                |
| Pa312              | ggggacaagttgtacaaaaagcaggctcattctacctgctcaacagccg | <i>attB1</i>      | Up<br>PA14_45960          | Generate<br>mutant                |
| Pa313              | agaggcaagatcagagagtaataagaccgtcaaccaaggccatagc    | -                 | Up and down<br>PA14_45960 | Generate<br>mutant                |
| Pa314              | gctatggccttggtgacggtcttattactctctgatcttgctct      | -                 | Up and down<br>PA14_45960 | Generate<br>mutant                |
| Pa315              | ggggaccactttgtacaagaaagctgggtagaacggctgagttccaga  | <i>attB2</i>      | Down<br>PA14_45960        | Generate<br>mutant                |
| Pa316 <sup>#</sup> | tcaacatggtcacctccagc                              | -                 | Up<br>PA14_45960          | Sanger<br>sequencing              |
| Pa317 <sup>#</sup> | tccagcgtacagtcggaaaag                             | -                 | Down<br>PA14_45960        | Sanger<br>sequencing              |

|                    |                                                     |              |                           |                   |
|--------------------|-----------------------------------------------------|--------------|---------------------------|-------------------|
| Pa339              | ggggacaagtttgtaaaaaagcaggctcaggacgaagagaccctgctga   | <i>attB1</i> | Up<br>PA14_05360          | Generate mutant   |
| Pa340              | cctatgctcaggcctgctctctcatattggccccgc                | -            | Up and down<br>PA14_05360 | Generate mutant   |
| Pa341              | gcggggccaaatgaagagagcaggcctgagcatagg                | -            | Up and down<br>PA14_05360 | Generate mutant   |
| Pa342              | ggggaccactttgtacaagaaagctgggtacaggctccagcacattcagcc | <i>attB2</i> | Down<br>PA14_05360        | Generate mutant   |
| Pa343 <sup>#</sup> | ccaggctactcaaggccgaga                               | -            | Up<br>PA14_05360          | Sanger sequencing |
| Pa344 <sup>#</sup> | tgctgagtacccttacgg                                  | -            | Down<br>PA14_05360        | Sanger sequencing |
| Pa345              | ggggacaagtttgtaaaaaagcaggctcagggtgagggtctcgaggatc   | <i>attB1</i> | Up<br>PA14_05320          | Generate mutant   |
| Pa346              | gcggccggatatcaggaaacctgttccatgttcgccctata           | -            | Up and down<br>PA14_05320 | Generate mutant   |
| Pa347              | tataggcgcaacatggaacaggttctgatatccggccgc             | -            | Up and down<br>PA14_05320 | Generate mutant   |
| Pa348              | ggggaccactttgtacaagaaagctgggtatgcatgccgaacacctcatc  | <i>attB2</i> | Down<br>PA14_05320        | Generate mutant   |
| Pa349 <sup>#</sup> | cgccgtcgatcatcaggatg                                | -            | Up<br>PA14_05320          | Sanger sequencing |
| Pa350 <sup>#</sup> | tcgaggaagccctggtgtg                                 | -            | Down<br>PA14_05320        | Sanger sequencing |
| Pa351              | ggggacaagtttgtaaaaaagcaggctcacgataaccgtggcaaggtc    | <i>attB1</i> | Up<br>PA14_16500          | Generate mutant   |
| Pa352              | gcggcaccggctgttcgtgcatgtttctctccggga                | -            | Up and down<br>PA14_16500 | Generate mutant   |
| Pa353              | tcccggagagaaacatgcacgaacagccgggtgccgc               | -            | Up and down<br>PA14_16500 | Generate mutant   |
| Pa354              | ggggaccactttgtacaagaaagctgggtactgactcgccctgatgtgc   | <i>attB2</i> | Down<br>PA14_16500        | Generate mutant   |
| Pa355 <sup>#</sup> | tcatggcggaaagtccttgc                                | -            | Up<br>PA14_16500          | Sanger sequencing |
| Pa356 <sup>#</sup> | tcatcgcggtgtccttgtg                                 | -            | Down<br>PA14_16500        | Sanger sequencing |
| Pa357              | ggggacaagtttgtaaaaaagcaggctcaggagagctggacctgatcgt   | <i>attB1</i> | Up<br>PA14_55160          | Generate mutant   |
| Pa358              | atcggcgttcagcaggctgtcgcagtcataagtgatggc             | -            | Up and down<br>PA14_55160 | Generate mutant   |
| Pa359              | gccatcacttatgactgacagcctgctgaacgccgat               | -            | Up and down<br>PA14_55160 | Generate mutant   |
| Pa360              | ggggaccactttgtacaagaaagctgggtacgggcccagaaaaatcctc   | <i>attB2</i> | Down<br>PA14_55160        | Generate mutant   |
| Pa361 <sup>#</sup> | gaaccgctgctggtcac                                   | -            | Up<br>PA14_55160          | Sanger sequencing |
| Pa362 <sup>#</sup> | tgtgtcgttctgtcactcgt                                | -            | Down<br>PA14_55160        | Sanger sequencing |

|                    |                                                       |              |                           |                                   |
|--------------------|-------------------------------------------------------|--------------|---------------------------|-----------------------------------|
| Pa367              | tcgaccagcaggacatcaac                                  | -            | Up<br>PA14_50480          | Verify<br>transposon<br>insertion |
| Pa368              | atgctcatgctctactccgc                                  | -            | Down<br>PA14_50480        | Verify<br>transposon<br>insertion |
| Pa369              | agggtagagtcagccggaat                                  | -            | Up<br>PA14_58750          | Verify<br>transposon<br>insertion |
| Pa370              | gccttcaccagcatagggtt                                  | -            | Down<br>PA14_58750        | Verify<br>transposon<br>insertion |
| Pa371              | caatcggtgatctcgagacc                                  | -            | Up<br>PA14_05190          | Verify<br>transposon<br>insertion |
| Pa372              | aggaaatccagttggccgag                                  | -            | Down<br>PA14_05190        | Verify<br>transposon<br>insertion |
| Pa373              | actggatggggccgatgaa                                   | -            | Up<br>PA14_05180          | Verify<br>transposon<br>insertion |
| Pa374              | ataccatgccaccagggtg                                   | -            | Down<br>PA14_05180        | Verify<br>transposon<br>insertion |
| Pa381              | ggggacaagttgtacaaaaagcaggctcacgaagtgatctacccgacg<br>g | <i>attB1</i> | Up<br>PA14_64230          | Generate<br>mutant                |
| Pa382              | gtcgtgccctcaggagatccgaagccgtaccac                     | -            | Up and down<br>PA14_64230 | Generate<br>mutant                |
| Pa383              | gtggtacggcttcggatctctgagggcagcgac                     | -            | Up and down<br>PA14_64230 | Generate<br>mutant                |
| Pa384              | ggggaccactttgtacaagaaagctgggtagatgaagatgtagcggccga    | <i>attB2</i> | Down<br>PA14_64230        | Generate<br>mutant                |
| Pa385 <sup>#</sup> | aggaggccagcttcatcgt                                   | -            | Up<br>PA14_64230          | Sanger<br>sequencing              |
| Pa386 <sup>#</sup> | gcagacgaacagacccatca                                  | -            | Down<br>PA14_64230        | Sanger<br>sequencing              |
| Pa387              | ggggacaagttgtacaaaaagcaggctcactgatcctgttccagcagca     | <i>attB1</i> | Up<br>PA14_30650          | Generate<br>mutant                |
| Pa388              | atctagctggcggcatcgac(aatcacgctgcacctcgtc)             | -            | Up and down<br>PA14_30650 | Generate<br>mutant                |
| Pa389              | gacgaggtgcagcgtgatt(gtcgatgccgccagctagat)             | -            | Up and down<br>PA14_30650 | Generate<br>mutant                |
| Pa390              | ggggaccactttgtacaagaaagctgggtattgcagcgcctgatctggta    | <i>attB2</i> | Down<br>PA14_30650        | Generate<br>mutant                |
| Pa391 <sup>#</sup> | ctgatcctgttccagcagca                                  | -            | Up<br>PA14_30650          | Sanger<br>sequencing              |
| Pa392 <sup>#</sup> | cctgctccatgccgacg                                     | -            | Down<br>PA14_30650        | Sanger<br>sequencing              |
| Pa393              | ggggacaagttgtacaaaaagcaggctcacaagtacaacgttccgctgc     | <i>attB1</i> | Up<br>PA14_52570          | Generate<br>mutant                |

|                    |                                                          |              |                                                       |                                   |
|--------------------|----------------------------------------------------------|--------------|-------------------------------------------------------|-----------------------------------|
| Pa394              | ttaatggttggctcttgatctttcattcctttctcctcacggaat            | -            | Up and down<br>PA14_52570                             | Generate<br>mutant                |
| Pa395              | attcgctgaggagaaaggaatgaaagatcaagagccaaaccattaa           | -            | Up and down<br>PA14_52570                             | Generate<br>mutant                |
| Pa396              | gggaccactttgtacaagaaagctgggtataaaactgctctaccgcctcc       | <i>attB2</i> | Down<br>PA14_52570                                    | Generate<br>mutant                |
| Pa397 <sup>#</sup> | ggcgtctacaccaccgatc                                      | -            | Up<br>PA14_52570                                      | Sanger<br>sequencing              |
| Pa398 <sup>#</sup> | aaactgctctaccgcctcc                                      | -            | Down<br>PA14_52570                                    | Sanger<br>sequencing              |
| Pa399              | ggggacaagtttgtacaaaaagcaggctcactcgatgatgatgccgagct       | <i>attB1</i> | Up<br>PA14_58730                                      | Generate<br>mutant                |
| Pa400              | tcttttcagcattagcctattagcgctgagctttcatgtatctctccattg      | -            | Up and down<br>PA14_58730                             | Generate<br>mutant                |
| Pa401              | caatggagagatacatgaaagctcagcgctaataaggctaagtctgaaaag<br>a | -            | Up and down<br>PA14_58730                             | Generate<br>mutant                |
| Pa402              | gggaccactttgtacaagaaagctgggtaccaattgggtctgtagcgggt       | <i>attB2</i> | Down<br>PA14_58730                                    | Generate<br>mutant                |
| Pa403 <sup>#</sup> | cgttcggagatatccaggcc                                     | -            | Up<br>PA14_58730                                      | Sanger<br>sequencing              |
| Pa404 <sup>#</sup> | ctacatctccatcggcaccc                                     | -            | Down<br>PA14_58730                                    | Sanger<br>sequencing              |
| Pa405              | ggggacaagtttgtacaaaaagcaggctcatccctatgtgcggaatacc        | <i>attB1</i> | Up<br>PA14_50290                                      | Generate<br>mutant                |
| Pa406              | cagctggttggcctgggcaaggccatggtgattcc                      | -            | Up and down<br>PA14_50290                             | Generate<br>mutant                |
| Pa407              | ggaaatcaccatggccctgccaggccaaccagctg                      | -            | Up and down<br>PA14_50290                             | Generate<br>mutant                |
| Pa408              | gggaccactttgtacaagaaagctgggtatacgggtgtaatcggctcagc       | <i>attB2</i> | Down<br>PA14_50290                                    | Generate<br>mutant                |
| Pa409 <sup>#</sup> | tccctatgtgcggaatacc                                      | -            | Up<br>PA14_50290                                      | Sanger<br>sequencing              |
| Pa410 <sup>#</sup> | cgacggagatgttcagcgta                                     | -            | Down<br>PA14_50290                                    | Sanger<br>sequencing              |
| Sa046              | ctcgattctattaacaagg                                      | -            | “Upstream”<br><i>bursa<br/>aurealis</i><br>transposon | Verify<br>transposon<br>insertion |
| Sa047              | gcttttctaaatgtttttaagtaaataca                            | -            | “Buster”<br><i>bursa<br/>aurealis</i><br>transposon   | Verify<br>transposon<br>insertion |
| Sa094              | agaaaagcctatggaaattgcctc                                 | -            | Up<br>SAUSA300_<br>1992                               | Verify<br>transposon<br>insertion |
| Sa095              | tcaccgatgcatagcagtg                                      | -            | Down<br>SAUSA300_<br>1992                             | Verify<br>transposon<br>insertion |

|       |                            |   |                           |                                   |
|-------|----------------------------|---|---------------------------|-----------------------------------|
| Sa096 | gtataatgacagtgaggagagtggtg | - | Up<br>SAUSA300_<br>1989   | Verify<br>transposon<br>insertion |
| Sa097 | aggacgcgctatcaaacatt       | - | Down<br>SAUSA300_<br>1989 | Verify<br>transposon<br>insertion |
| Sa098 | gagagtgtgatagtaggtggaattat | - | Up<br>SAUSA300_<br>1991   | Verify<br>transposon<br>insertion |
| Sa099 | gctggtatatcatcagcgc        | - | Down<br>SAUSA300_<br>1991 | Verify<br>transposon<br>insertion |

168 \* Up = upstream arm of gene; down = downstream arm of gene.

169 # Primers utilized for Sanger sequencing.

170 ^ Site is underlined in primer sequence.



171 **SUPPLEMENTAL REFERENCES**

172

- 173 1. Ha DG, Kuchma SL, O'Toole GA. 2014. Plate-based assay for swimming motility in  
174 *Pseudomonas aeruginosa*. *Methods Mol Biol* 1149:59-65.
- 175 2. Burrows LL. 2012. *Pseudomonas aeruginosa* twitching motility: type IV pili in action.  
176 *Annu Rev Microbiol* 66:493-520.
- 177 3. Köhler T, Curty LK, Barja F, van Delden C, Pechère JC. 2000. Swarming of  
178 *Pseudomonas aeruginosa* is dependent on cell-to-cell signaling and requires flagella and  
179 pili. *J Bacteriol* 182:5990-6.
- 180 4. Caiazza NC, Shanks RM, O'Toole GA. 2005. Rhamnolipids modulate swarming motility  
181 patterns of *Pseudomonas aeruginosa*. *J Bacteriol* 187:7351-61.
- 182 5. Zarrella TM, Khare A. 2022. Systematic identification of molecular mediators of  
183 interspecies sensing in a community of two frequently coinfecting bacterial pathogens.  
184 *PLoS Biol* 20:e3001679.
- 185 6. Ashburner M, Ball CA, Blake JA, Botstein D, Butler H, Cherry JM, Davis AP, Dolinski K,  
186 Dwight SS, Eppig JT, Harris MA, Hill DP, Issel-Tarver L, Kasarskis A, Lewis S, Matese  
187 JC, Richardson JE, Ringwald M, Rubin GM, Sherlock G. 2000. Gene Ontology: tool for  
188 the unification of biology. The Gene Ontology Consortium. *Nat Genet* 25:25-9.
- 189 7. Mi H, Muruganujan A, Ebert D, Huang X, Thomas PD. 2019. PANTHER version 14:  
190 more genomes, a new PANTHER GO-slim and improvements in enrichment analysis  
191 tools. *Nucleic Acids Res* 47:D419-D426.
- 192 8. Gene Ontology C. 2021. The Gene Ontology resource: enriching a GOld mine. *Nucleic  
193 Acids Res* 49:D325-D334.
- 194 9. Rahme LG, Stevens EJ, Wolfort SF, Shao J, Tompkins RG, Ausubel FM. 1995.  
195 Common virulence factors for bacterial pathogenicity in plants and animals. *Science*  
196 268:1899-902.
- 197 10. Liberati NT, Urbach JM, Miyata S, Lee DG, Drenkard E, Wu G, Villanueva J, Wei T,  
198 Ausubel FM. 2006. An ordered, nonredundant library of *Pseudomonas aeruginosa* strain  
199 PA14 transposon insertion mutants. *Proc Natl Acad Sci U S A* 103:2833-8.
- 200 11. Khare A, Tavazoie S. 2015. Multifactorial competition and resistance in a two-species  
201 bacterial system. *PLoS Genet* 11:e1005715.
- 202 12. Kennedy AD, Otto M, Braughton KR, Whitney AR, Chen L, Mathema B, Mediavilla JR,  
203 Byrne KA, Parkins LD, Tenover FC, Kreiswirth BN, Musser JM, DeLeo FR. 2008.  
204 Epidemic community-associated methicillin-resistant *Staphylococcus aureus*: recent  
205 clonal expansion and diversification. *Proc Natl Acad Sci U S A* 105:1327-32.

- 206 13. Fey PD, Endres JL, Yajjala VK, Widhelm TJ, Boissy RJ, Bose JL, Bayles KW. 2013. A  
207 genetic resource for rapid and comprehensive phenotype screening of nonessential  
208 *Staphylococcus aureus* genes. MBio 4:e00537-12.
- 209 14. Wang GZW, E. A.; Haas, A. L.; Sánchez Peña, A.; Kiedrowski, M. R.; Lomenick, B.;  
210 Chou, T.; Bomberger, J. M.; Tirrell, D. A.; Limoli, D. H. 2023. *Staphylococcal* secreted  
211 cytotoxins are competition sensing signals for *Pseudomonas aeruginosa*. bioRxiv  
212 doi:<https://doi.org/10.1101/2023.01.29.526047>.
- 213 15. Dastgheyb SS, Villaruz AE, Le KY, Tan VY, Duong AC, Chatterjee SS, Cheung GY, Joo  
214 HS, Hickok NJ, Otto M. 2015. Role of Phenol-Soluble Modulins in Formation of  
215 *Staphylococcus aureus* Biofilms in Synovial Fluid. Infect Immun 83:2966-75.
- 216 16. de Lorenzo V, Timmis KN. 1994. Analysis and construction of stable phenotypes in  
217 gram-negative bacteria with Tn5- and Tn10-derived minitransposons. Methods Enzymol  
218 235:386-405.
- 219 17. Guyer MS, Reed RR, Steitz JA, Low KB. 1981. Identification of a sex-factor-affinity site  
220 in *E. coli* as gamma delta. Cold Spring Harb Symp Quant Biol 45 Pt 1:135-40.
- 221 18. Piewngam P, Zheng Y, Nguyen TH, Dickey SW, Joo HS, Villaruz AE, Glose KA, Fisher  
222 EL, Hunt RL, Li B, Chiou J, Pharkjaksu S, Khongthong S, Cheung GYC, Kiratisin P, Otto  
223 M. 2018. Pathogen elimination by probiotic *Bacillus* via signalling interference. Nature  
224 562:532-537.
- 225 19. Fazli M, Harrison JJ, Gambino M, Givskov M, Tolker-Nielsen T. 2015. In-frame and  
226 unmarked gene deletions in *Burkholderia cenocepacia* via an allelic exchange system  
227 compatible with Gateway technology. Appl Environ Microbiol 81:3623-30.
- 228 20. Mlynek KD, Bullock LL, Stone CJ, Curran LJ, Sadykov MR, Bayles KW, Brinsmade SR.  
229 2020. Genetic and biochemical analysis of CodY-mediated cell aggregation in  
230 *Staphylococcus aureus* reveals an interaction between extracellular DNA and  
231 polysaccharide in the extracellular matrix. J Bacteriol 202:e00593-19.
- 232 21. Choi KH, Schweizer HP. 2006. mini-Tn7 insertion in bacteria with single *attTn7* sites:  
233 example *Pseudomonas aeruginosa*. Nat Protoc 1:153-61.  
234
